# Supplementary material for: Dual melanocortin-4 receptor and GLP-1 receptor agonism amplifies metabolic benefits in diet-induced obese mice
Source: PubMed Central journal article supplement (PMC4364946; doi:10.15252/emmm.201404508), 2015-02-04
Supplement: emmm0007-0288-sd1.pdf [file emmm0007-0288-sd1.pdf]

## **Supplementary information**

### **Dual melanocortin-4 receptor and GLP-1 receptor agonism amplifies metabolic benefits in diet-induced obese mice**

Christoffer Clemmensen, Brian Finan, Katrin Fischer, Robby Zachariah Tom, Beata Legutko, Laura Sehrer, Daniela Heine, Niklas Grassl, Carola W. Meyer, Bart Henderson, Susanna M. Hofmann, Matthias H. Tschöp, Lex H.T. Van der Ploeg and Timo D. Müller

#### **Contents:**

##### **1) Supplementary figure legends**

##### **2) Figure S1**

Effect on liraglutide and RM-493 co-treatment on body weight and body composition in DIO mice.

##### **3) Figure S2**

Effect on liraglutide and RM-493 co-treatment on insulin-induced phosphorylation of AKT in DIO mice.

##### **4) Supplementary Table S1**

P-values of statistical significant findings

#### **Supplementary figure legends**

**Figure S1. Effect of liraglutide and RM-493 co-treatment on body weight and body composition in DIO mice.** (A-C) Five-day treatment and (D-F) 22-day treatment of DIO male mice with vehicle (white), liraglutide (10 nmoles/kg) (grey), RM-493 (3.6  $\mu$ moles/kg) (black) or liraglutide (10 nmoles/kg) and RM-493 (3.6  $\mu$ moles/kg) (checkered). Effects on (A) body weight and (B and C) body composition following 5 days of treatment. Effects on (D) body weight and (E and F) body composition following 22 days of treatment. Compounds were administered by daily subcutaneous injections. Data represent means  $\pm$  SEM;  $n = 8$ ; \* $P < 0.05$ , \*\* $P < 0.01$ , \*\*\* $P < 0.001$ .

**Figure S2. Effect of liraglutide and RM-493 co-treatment on insulin-induced phosphorylation of AKT in DIO mice.** Phosphorylation of AKT (p-AKT<sup>Ser473</sup>) was assessed in (A) epididymal white adipose tissue (eWAT) and (B) soleus muscle in DIO mice treated for 5 days with vehicle (white), liraglutide (10 nmoles/kg) (grey), RM-493 (3.6  $\mu$ moles/kg) (black) or liraglutide (10 nmoles/kg) and RM-493 (3.6  $\mu$ moles/kg) (checkered). Compounds were administered by daily subcutaneous

injections and the last injection was provided 2h prior to tissues sampling. Insulin ( $n = 5$ ) or saline ( $n = 3$ ) was injected 10 min prior to tissue removal. Data represent means  $\pm$  SEM.

**A**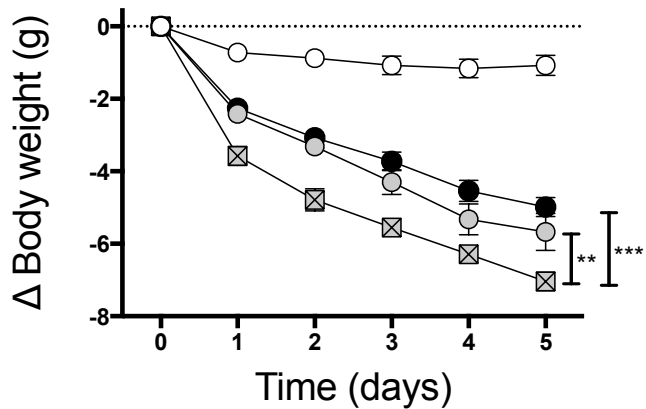**B**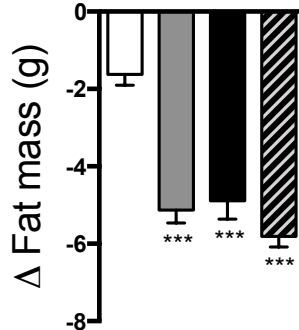**C**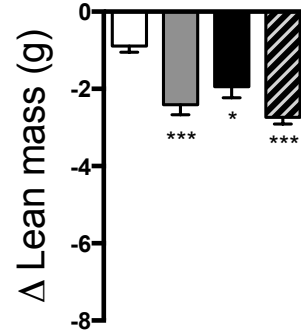

□ / ○ Vehicle    ■ / ● Liraglutide

■ / ● RM-493

▨ / ▩ Liraglutide + RM-493

**D**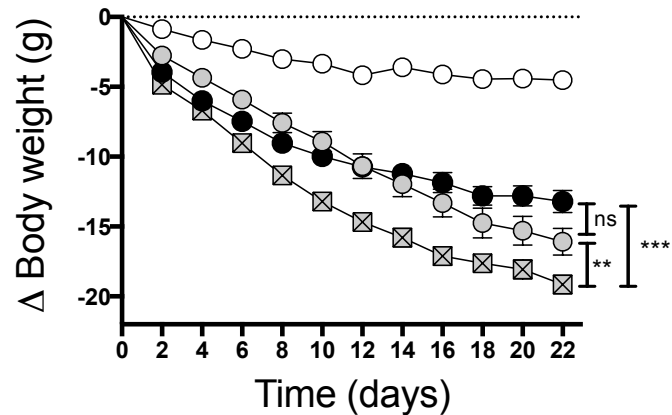**E**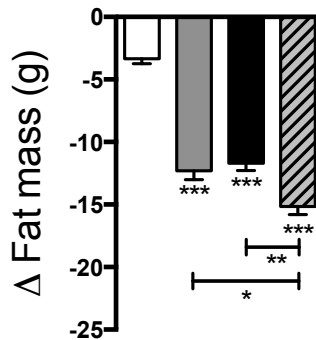**F**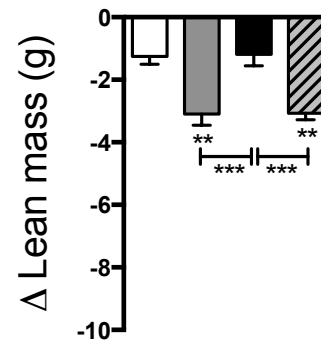

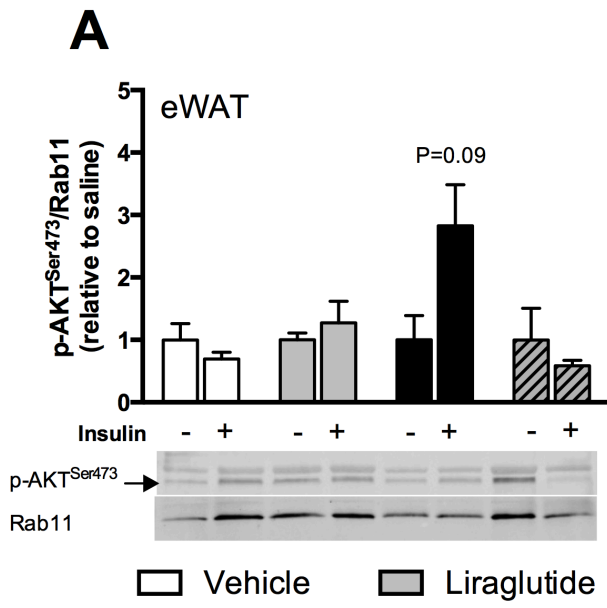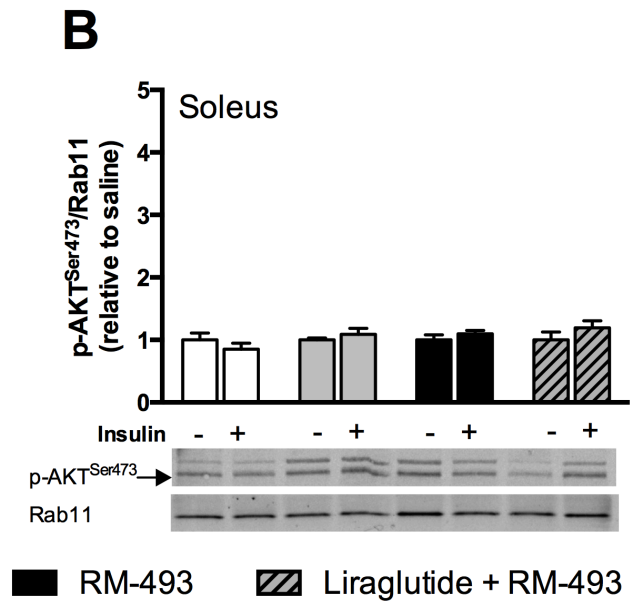

**Supplementary Table 1.**

P-values of statistical significant findings

Vhcl; Vehicle  
Lira; Liraglutide  
RM; RM-493  
Combo; Liraglutide + RM-493

| Figure         | Comparison                        | P-value                           |                                    |                                   |                                   |
|----------------|-----------------------------------|-----------------------------------|------------------------------------|-----------------------------------|-----------------------------------|
| 1              | A                                 | Vhcl vs. Lira                     | *** 0.0001 2way ANOVO -Bonferroni  |                                   |                                   |
|                |                                   | Vhcl vs. RM                       | *** 0.0001 2way ANOVO -Bonferroni  |                                   |                                   |
|                |                                   | Lira vs. Combo                    | *** 0.0006 2way ANOVO -Bonferroni  |                                   |                                   |
|                |                                   | RM vs. Combo                      | *** 0.0001 1way ANOVA -Bonferroni  |                                   |                                   |
|                | B                                 | Vhcl vs. Lira                     | *** 0.0001 1way ANOVA -Bonferroni  |                                   |                                   |
|                |                                   | Vhcl vs. RM                       | *** 0.0001 1way ANOVA -Bonferroni  |                                   |                                   |
|                |                                   | Vhcl vs. Combo                    | *** 0.0001 1way ANOVA -Bonferroni  |                                   |                                   |
|                | C                                 | Vhcl vs. Lira                     | *** 0.0001 1way ANOVA -Bonferroni  |                                   |                                   |
|                |                                   | Vhcl vs. RM                       | ** 0.0068 1way ANOVA -Bonferroni   |                                   |                                   |
|                |                                   | Vhcl vs. Combo                    | *** 0.0001 1way ANOVA -Bonferroni  |                                   |                                   |
|                |                                   | RM vs. Combo                      | * 0.0325 1way ANOVA -Bonferroni    |                                   |                                   |
|                | 2                                 | B                                 | Vhcl vs. RM                        | *** 0.0001 1way ANOVA -Bonferroni |                                   |
| Vhcl vs. Combo |                                   |                                   | *** 0.0001 1way ANOVA -Bonferroni  |                                   |                                   |
| Lira vs. RM    |                                   |                                   | *** 0.0001 1way ANOVA -Bonferroni  |                                   |                                   |
| Lira vs. Combo |                                   |                                   | *** 0.0001 1way ANOVA -Bonferroni  |                                   |                                   |
| C              |                                   | Total Vhcl vs. Lira               | *** 0.0001 1way ANOVA -Bonferroni  |                                   |                                   |
|                |                                   | Total Vhcl vs. RM                 | *** 0.0001 1way ANOVA -Bonferroni  |                                   |                                   |
|                |                                   | Total Vhcl vs. Combo              | *** 0.0001 1way ANOVA -Bonferroni  |                                   |                                   |
|                |                                   | Dark Vhcl vs. Lira                | *** 0.0001 1way ANOVA -Bonferroni  |                                   |                                   |
|                |                                   | Dark Vhcl vs. RM                  | *** 0.0001 1way ANOVA -Bonferroni  |                                   |                                   |
|                |                                   | Dark Vhcl vs. Combo               | *** 0.0001 1way ANOVA -Bonferroni  |                                   |                                   |
|                |                                   | Dark RM vs. Combo                 | * 0.0451 1way ANOVA -Bonferroni    |                                   |                                   |
|                |                                   | Light Vhcl vs. Lira               | *** 0.0001 1way ANOVA -Bonferroni  |                                   |                                   |
|                |                                   | Light Vhcl vs. RM                 | *** 0.0009 1way ANOVA -Bonferroni  |                                   |                                   |
|                |                                   | Light Vhcl vs. Combo              | *** 0.0001 1way ANOVA -Bonferroni  |                                   |                                   |
|                |                                   | E                                 | RM vs. Combo                       | ** 0.0096 2way ANOVO -Bonferroni  |                                   |
|                |                                   |                                   | Lira vs. Combo                     | * 0.0198 2way ANOVO -Bonferroni   |                                   |
| F              |                                   | Total Vhcl vs. Lira               | *** 0.0001 1way ANOVA -Bonferroni  |                                   |                                   |
|                |                                   | Total Vhcl vs. RM                 | *** 0.0001 1way ANOVA -Bonferroni  |                                   |                                   |
|                |                                   | Total Vhcl vs. Combo              | *** 0.0001 1way ANOVA -Bonferroni  |                                   |                                   |
|                |                                   | Dark Vhcl vs. Lira                | *** 0.0001 1way ANOVA -Bonferroni  |                                   |                                   |
|                |                                   | Dark Vhcl vs. RM                  | *** 0.0001 1way ANOVA -Bonferroni  |                                   |                                   |
|                |                                   | Dark Vhcl vs. Combo               | *** 0.0001 1way ANOVA -Bonferroni  |                                   |                                   |
|                |                                   | Dark RM vs. Combo                 | * 0.0389 1way ANOVA -Bonferroni    |                                   |                                   |
|                |                                   | Light Vhcl vs. Lira               | ** 0.0023 1way ANOVA -Bonferroni   |                                   |                                   |
|                |                                   | Light Vhcl vs. Combo              | ** 0.0032 1way ANOVA -Bonferroni   |                                   |                                   |
|                |                                   | G                                 | Dark Vhcl vs. Lira                 | * 0.0204 1way ANOVA -Bonferroni   |                                   |
| 3              |                                   | A                                 | GLP1R Vhcl vs. Lira                | ** 0.0030 1way ANOVA -Bonferroni  |                                   |
|                |                                   |                                   | GLP1R Vhcl vs. Combo               | # 0.0157 1way ANOVA -Bonferroni   |                                   |
|                | POMC Vhcl vs. RM                  |                                   | ** 0.0057 1way ANOVA -Bonferroni   |                                   |                                   |
|                | POMC Lira vs. RM                  |                                   | ### 0.0004 1way ANOVA -Bonferroni  |                                   |                                   |
|                | NPY Vhcl vs. RM                   |                                   | * 0.0166 1way ANOVA -Bonferroni    |                                   |                                   |
|                | NPY Lira vs. RM                   |                                   | #### 0.0002 1way ANOVA -Bonferroni |                                   |                                   |
|                | NPY RM vs. Combo                  |                                   | + 0.0479 1way ANOVA -Bonferroni    |                                   |                                   |
|                | AGRP Vhcl vs. RM                  |                                   | * 0.0151 1way ANOVA -Bonferroni    |                                   |                                   |
|                | AGRP Lira vs. RM                  |                                   | ## 0.0023 1way ANOVA -Bonferroni   |                                   |                                   |
|                | AGRP Lira vs. Combo               |                                   | # 0.0108 1way ANOVA -Bonferroni    |                                   |                                   |
|                | B                                 | GLP1R Vhcl vs. Combo              | ** 0.0072 1way ANOVA -Bonferroni   |                                   |                                   |
|                |                                   | GLP1R Lira vs. Combo              | ### 0.0038 1way ANOVA -Bonferroni  |                                   |                                   |
|                |                                   | MC4R Vhcl vs. RM                  | § 0.0006 1way ANOVA -Bonferroni    |                                   |                                   |
|                |                                   | MC4R Vhcl vs. Combo               | § 0.007 1way ANOVA -Bonferroni     |                                   |                                   |
|                |                                   | AGRP Vhcl vs. RM                  | * 0.0221 1way ANOVA -Bonferroni    |                                   |                                   |
|                |                                   | AGRP Vhcl vs. Combo               | ** 0.0013 1way ANOVA -Bonferroni   |                                   |                                   |
|                |                                   | AGRP Lira vs. Combo               | # 0.0471 1way ANOVA -Bonferroni    |                                   |                                   |
|                |                                   | 4                                 | A                                  | Vhcl vs. Lira                     | *** 0.0001 1way ANOVA -Bonferroni |
|                |                                   |                                   |                                    | Vhcl vs. Combo                    | *** 0.0001 1way ANOVA -Bonferroni |
|                |                                   |                                   |                                    | Lira vs. RM                       | * 0.0426 1way ANOVA -Bonferroni   |
| RM vs. Combo   | *** 0.0001 1way ANOVA -Bonferroni |                                   |                                    |                                   |                                   |
| C              | Vhcl vs. Combo                    |                                   | ** 0.0017 1way ANOVA -Bonferroni   |                                   |                                   |
|                | RM vs. Combo                      |                                   | * 0.0116 1way ANOVA -Bonferroni    |                                   |                                   |
| D              | Vhcl vs. Combo                    |                                   | * 0.0458 1way ANOVA -Bonferroni    |                                   |                                   |
| F              | Vhcl vs. Lira                     |                                   | * 0.0347 1way ANOVA -Bonferroni    |                                   |                                   |
|                | Vhcl vs. Combo                    | ** 0.0097 1way ANOVA -Bonferroni  |                                    |                                   |                                   |
| G              | Vhcl vs. Combo                    | * 0.0104 1way ANOVA -Bonferroni   |                                    |                                   |                                   |
| H              | Vhcl vs. Lira                     | *** 0.0001 2way ANOVO -Bonferroni |                                    |                                   |                                   |

|                      |                     |                          |                        |                        |                        |
|----------------------|---------------------|--------------------------|------------------------|------------------------|------------------------|
|                      |                     | Vhcl vs. RM              | ***                    | 0.0001                 | 2way ANOVO -Bonferroni |
|                      |                     | Vhcl vs. Combo           | ***                    | 0.0001                 | 2way ANOVO -Bonferroni |
|                      | I                   | Combo saline vs. Insulin | *                      | 0.0478                 | Student's t-test       |
| 5                    | B                   | Vhcl vs. Combo           | *                      | 0.0256                 | 1way ANOVA -Bonferroni |
|                      |                     | Lira vs. Combo           | *                      | 0.0252                 | 1way ANOVA -Bonferroni |
|                      | C                   | LDLR Vhcl vs. Lira       | ***                    | 0.0001                 | 1way ANOVA -Bonferroni |
|                      |                     | LDLR Vhcl vs. RM         | ***                    | 0.0001                 | 1way ANOVA -Bonferroni |
|                      |                     | LDLR Vhcl vs. Combo      | ***                    | 0.0001                 | 1way ANOVA -Bonferroni |
|                      |                     | PCSK9 Vhcl vs. Lira      | **                     | 0.0011                 | 1way ANOVA -Bonferroni |
|                      |                     | PCSK9 Vhcl vs. RM        | ***                    | 0.0001                 | 1way ANOVA -Bonferroni |
|                      |                     | PCSK9 Vhcl vs. Combo     | ***                    | 0.0001                 | 1way ANOVA -Bonferroni |
|                      |                     | LIPC Vhcl vs. Lira       | *                      | 0.0302                 | 1way ANOVA -Bonferroni |
|                      |                     | LIPC Vhcl vs. RM         | **                     | 0.0063                 | 1way ANOVA -Bonferroni |
|                      |                     | IDOL Vhcl vs. Lira       | **                     | 0.0017                 | 1way ANOVA -Bonferroni |
|                      |                     | IDOL Vhcl vs. RM         | *                      | 0.0124                 | 1way ANOVA -Bonferroni |
|                      | IDOL Vhcl vs. Combo | *                        | 0.0137                 | 1way ANOVA -Bonferroni |                        |
|                      | D                   | HMGRC Vhcl vs. Lira      | **                     | 0.0032                 | 1way ANOVA -Bonferroni |
|                      |                     | HMGRC Vhcl vs. RM        | ***                    | 0.0001                 | 1way ANOVA -Bonferroni |
|                      |                     | HMGRC Vhcl vs. Combo     | ***                    | 0.0001                 | 1way ANOVA -Bonferroni |
|                      |                     | CYP7A1 Vhcl vs. Lira     | **                     | 0.0058                 | 1way ANOVA -Bonferroni |
|                      |                     | CYP7A1 Lira vs. RM       | *                      | 0.0126                 | 1way ANOVA -Bonferroni |
|                      |                     | CYP8B1 Vhcl vs. Lira     | ***                    | 0.0004                 | 1way ANOVA -Bonferroni |
|                      |                     | CYP8B1 Vhcl vs. Combo    | **                     | 0.0013                 | 1way ANOVA -Bonferroni |
|                      |                     | CYP3A11 Vhcl vs. RM      | *                      | 0.0147                 | 1way ANOVA -Bonferroni |
|                      |                     | SQLE Vhcl vs. Lira       | ***                    | 0.0001                 | 1way ANOVA -Bonferroni |
|                      |                     | SQLE Vhcl vs. RM         | ***                    | 0.0001                 | 1way ANOVA -Bonferroni |
|                      |                     | SQLE Vhcl vs. Combo      | ***                    | 0.0001                 | 1way ANOVA -Bonferroni |
|                      |                     | APOE Vhcl vs. Lira       | ***                    | 0.0001                 | 1way ANOVA -Bonferroni |
|                      |                     | APOE Vhcl vs. RM         | ***                    | 0.0001                 | 1way ANOVA -Bonferroni |
| APOE Vhcl vs. Combo  |                     | ***                      | 0.0001                 | 1way ANOVA -Bonferroni |                        |
| ABCA1 Vhcl vs. Lira  | ***                 | 0.0001                   | 1way ANOVA -Bonferroni |                        |                        |
| ABCA1 Vhcl vs. Combo | **                  | 0.0095                   | 1way ANOVA -Bonferroni |                        |                        |
| ABCA1 Lira vs. RM    | *                   | 0.0482                   | 1way ANOVA -Bonferroni |                        |                        |
| ABCG5 Lira vs. Combo | *                   | 0.0131                   | 1way ANOVA -Bonferroni |                        |                        |
| 6                    | A                   | RM vs. Combo             | ***                    | 0.0002                 | 2way ANOVO -Bonferroni |
|                      |                     | Lira vs. Combo           | ***                    | 0.0003                 | 2way ANOVO -Bonferroni |
|                      | B                   | Vhcl vs. Lira            | ***                    | 0.0001                 | 2way ANOVO -Bonferroni |
|                      |                     | Vhcl vs. RM              | **                     | 0.0013                 | 2way ANOVO -Bonferroni |
|                      |                     | Vhcl vs. Combo           | ***                    | 0.0001                 | 2way ANOVO -Bonferroni |
|                      | C                   | Vhcl vs. Lira            | ***                    | 0.0001                 | 1way ANOVA -Bonferroni |
|                      |                     | Vhcl vs. RM              | ***                    | 0.0001                 | 1way ANOVA -Bonferroni |
|                      |                     | Vhcl vs. Combo           | ***                    | 0.0001                 | 1way ANOVA -Bonferroni |
|                      |                     | Lira vs. Combo           | *                      | 0.0469                 | 1way ANOVA -Bonferroni |
|                      |                     | RM vs. Combo             | *                      | 0.0156                 | 1way ANOVA -Bonferroni |
|                      | D                   | Vhcl vs. Lira            | ***                    | 0.0006                 | 1way ANOVA -Bonferroni |
|                      |                     | Vhcl vs. Combo           | ***                    | 0.0005                 | 1way ANOVA -Bonferroni |
|                      |                     | Lira vs. RM              | ***                    | 0.0004                 | 1way ANOVA -Bonferroni |
|                      |                     | RM vs. Combo             | ***                    | 0.0003                 | 1way ANOVA -Bonferroni |
| F                    | Vhcl vs. Lira       | *                        | 0.0156                 | 1way ANOVA -Bonferroni |                        |
|                      | Vhcl vs. Combo      | ***                      | 0.0005                 | 1way ANOVA -Bonferroni |                        |
|                      | RM vs. Combo        | **                       | 0.0093                 | 1way ANOVA -Bonferroni |                        |

|       |   |                            |    |        |                        |
|-------|---|----------------------------|----|--------|------------------------|
| Table | 1 | Cholesterol Vhcl vs. Lira  | *  | 0.0211 | 1way ANOVA -Bonferroni |
|       |   | Cholesterol Vhcl vs. Combo | ** | 0.0017 | 1way ANOVA -Bonferroni |

|    |   |                |     |        |                        |
|----|---|----------------|-----|--------|------------------------|
| S1 | A | Lira vs. Combo | **  | 0.0065 | 2way ANOVO -Bonferroni |
|    |   | RM vs. Combo   | *** | 0.0001 | 2way ANOVO -Bonferroni |
|    | B | Vhcl vs. Lira  | *** | 0.0001 | 1way ANOVA -Bonferroni |
|    |   | Vhcl vs. RM    | *** | 0.0001 | 1way ANOVA -Bonferroni |
|    |   | Vhcl vs. Combo | *** | 0.0001 | 1way ANOVA -Bonferroni |
|    | C | Vhcl vs. Lira  | *** | 0.0003 | 1way ANOVA -Bonferroni |
|    |   | Vhcl vs. RM    | *   | 0.0151 | 1way ANOVA -Bonferroni |
|    |   | Vhcl vs. Combo | *** | 0.0001 | 1way ANOVA -Bonferroni |
|    | D | Lira vs. Combo | **  | 0.0014 | 2way ANOVO -Bonferroni |
|    |   | RM vs. Combo   | *** | 0.0006 | 2way ANOVO -Bonferroni |
|    | E | Vhcl vs. Lira  | *** | 0.0001 | 1way ANOVA -Bonferroni |
|    |   | Vhcl vs. RM    | *** | 0.0001 | 1way ANOVA -Bonferroni |
|    |   | Vhcl vs. Combo | *** | 0.0001 | 1way ANOVA -Bonferroni |
|    |   | Lira vs. Combo | *   | 0.0117 | 1way ANOVA -Bonferroni |
|    | F | RM vs. Combo   | **  | 0.0018 | 1way ANOVA -Bonferroni |
|    |   | Vhcl vs. Lira  | **  | 0.0011 | 1way ANOVA -Bonferroni |
|    |   | Vhcl vs. Combo | **  | 0.0013 | 1way ANOVA -Bonferroni |
|    |   | Lira vs. RM    | *** | 0.0007 | 1way ANOVA -Bonferroni |
|    |   | RM vs. Combo   | *** | 0.0009 | 1way ANOVA -Bonferroni |
