# Supplementary material for: Dual melanocortin-4 receptor and GLP-1 receptor agonism amplifies metabolic benefits in diet-induced obese mice
Source: PubMed Central journal article supplement (PMC4364946; doi:10.15252/emmm.201404508), 2015-02-04
Supplement: emmm0007-0288-sd2.pdf [file emmm0007-0288-sd2.pdf]

## Dual melanocortin-4 receptor and GLP-1 receptor agonism amplifies metabolic benefits in diet-induced obese mice

Christoffer Clemmensen, Brian Finan, Katrin Fischer, Beata Legutko, Laura Sehrer, Daniela Heine, Niklas Grassl, Carola Meyer, Bart Henderson, Matthias Tschöp, Lex Van der Ploeg

*Corresponding author: Timo Müller, Helmholtz Zentrum Munich, IDO*

---

### Review timeline:

Submission date:

08 August 2014

Accepted:

13 January 2015

---

*Editor: Céline Carret*

### Transaction Report:

No Peer Review Process File is available with this article, as the authors have chosen not to make the review process public in this case.
